# Supplementary material for: Intramuscular IL-10 Administration Enhances the Activity of Myogenic Precursor Cells and Improves Motor Function in ALS Mouse Model
Source: MDPI journal article supplement (doi:10.3390/cells12071016), 2023-03-26
Supplement: s1 [file s1]

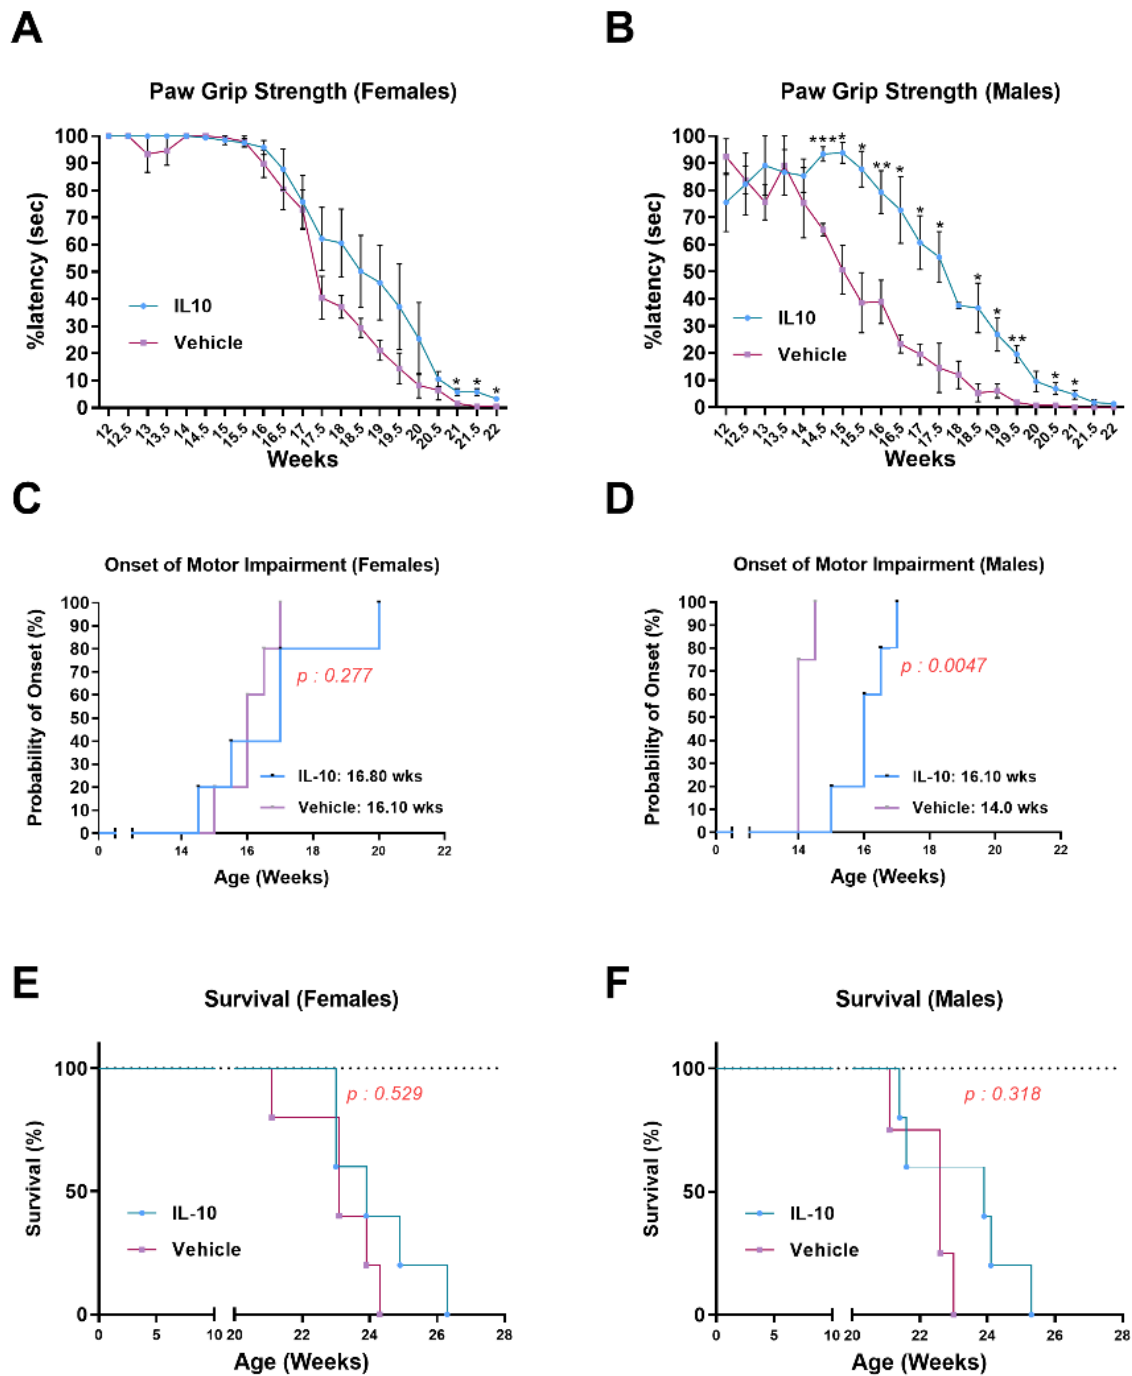

**Figure S1. Disease progression and survival of C57-SOD1G93A female and male mice. (A, B)** Paw Grip Endurance (PaGE) test for IL-10 ( $n=5$ ) and PBS ( $n=4-5$ ) treated C57-SOD1G93A females (A) and males (B) mice. The data are reported as mean  $\pm$  SEM for each time point. \*  $p < 0.05$ , \*\*  $p < 0.01$ , \*\*\*  $p < 0.001$  by repeated-measures ANOVA with Sidak's post-analysis. **(C, D)** IL-10-treated SOD1G93A male (C) but not female (D) mice had a delayed onset of motor impairment than PBS-treated mice. The  $p$  was calculated by the Mantel-Cox log-rank test. **(E, F)** IL-10-treated C57-SOD1G93A female (E) or male (F) mice did not show a significantly higher survival length than PBS-treated mice. The  $p$  was calculated by the Mantel-Cox log-rank test.

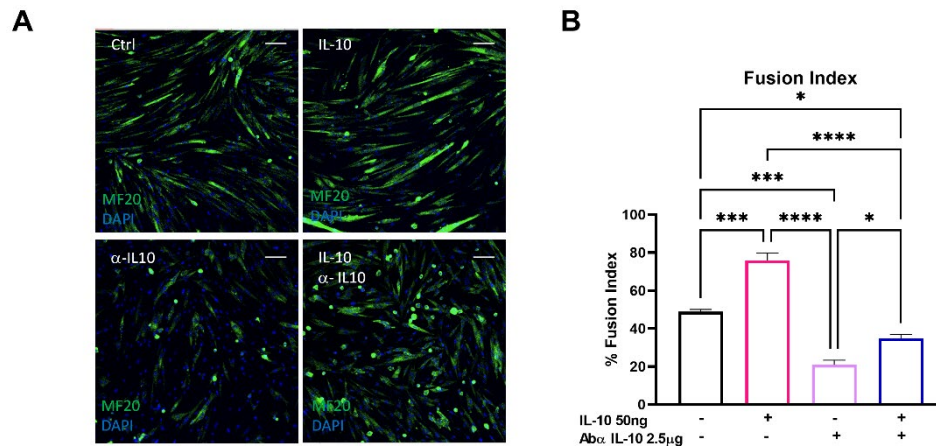

**Figure S2. IL-10 improves the rate of muscle fibre differentiation of C57-SOD1G93A-derived SCs.** (A) Representative confocal images showing the immunostaining for MF20-MyHC (green) and DAPI (blue) on primary C57-SOD1G93A SC cultures treated with 10ng/mL IL-10 and/or 2.5 $\mu$ g/mL Ab $\alpha$ IL10 in DM for 48h. Scale bar =100 $\mu$ m. (B) The fusion index was calculated as (no. nuclei present in MyHC+ cells with two or more nuclei/no. myotubes). Data are reported by mean  $\pm$  SEM from three independent experiments for each group. \*\*\* $p$  < 0.001, \*\*\*\* $p$  < 0.0001 by one-way ANOVA with Tukey's post-analysis.

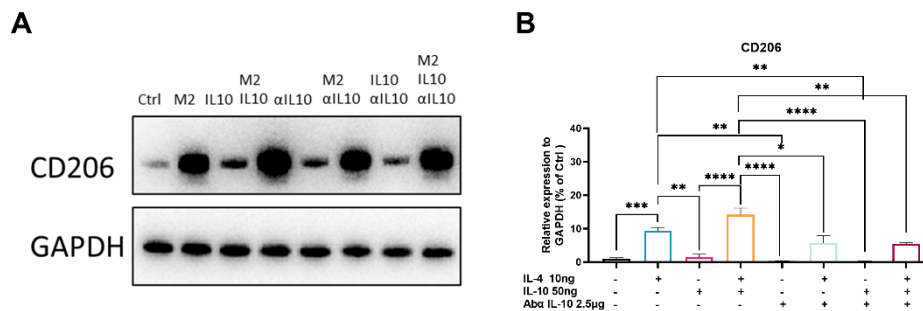

**Figure S3. IL-10 enhanced M $\Phi$  polarisation to M2 anti-inflammatory fingerprint.** (A, B) Representative immunoblot images (A) and densitometric analysis (B) of CD206 levels in C57-SOD1G93A-derived M $\Phi$  polarized in vivo for 24 hours to M2, with 10 ng/mL IL4 in the presence or absence of 50ng/mL IL-10 and/or 2.5 $\mu$ g/mL Ab $\alpha$ IL10. The data are reported as the percentage of untreated cells (mean  $\pm$  SEM) of six independent experiments for each group. \* $p$  < 0.05, \*\* $p$  < 0.01, \*\*\* $p$  < 0.001, \*\*\*\* $p$  < 0.0001 by one-way ANOVA with Tukey's post-analysis.
